# Supplementary material
Source: publisher figshare collection journal article supplement (https://gsajournals.figshare.com/ndownloader/files/21399357)
Supplement: Supplementary file 1 [file 21399357]

## Sheet: Table S7. Chromosomal LD Decay 
Table S8. Chromosomal LD decay distances
Chromosome	Background R2	Decay Dist Mb	Decay Dist cM
1	0.0232165	7.33	0.14
2	0.0239289	8.19	1.32
3	0.0237092	8.24	0.77
4	0.0255291	8.61	0.22
5	0.0238101	7.62	1.18
6	0.0225133	6.48	0.12
7	0.0226492	5.74	0.21
